# Supplementary material for: A sterol-enriched vacuolar microdomain mediates stationary phase lipophagy in budding yeast
Source: PubMed Central journal article supplement — J Cell Biol. 2014 Aug 4;206(3):357–66. doi: 10.1083/jcb.201404115 (PMC4121974; doi:10.1083/jcb.201404115), 2014-08-04
Supplement: supp_jcb.201404115_JCB_201404115_sm.pdf [file supp_jcb.201404115_JCB_201404115_sm.pdf]

Wang et al., <http://www.jcb.org/cgi/content/full/jcb.201404115/DC1>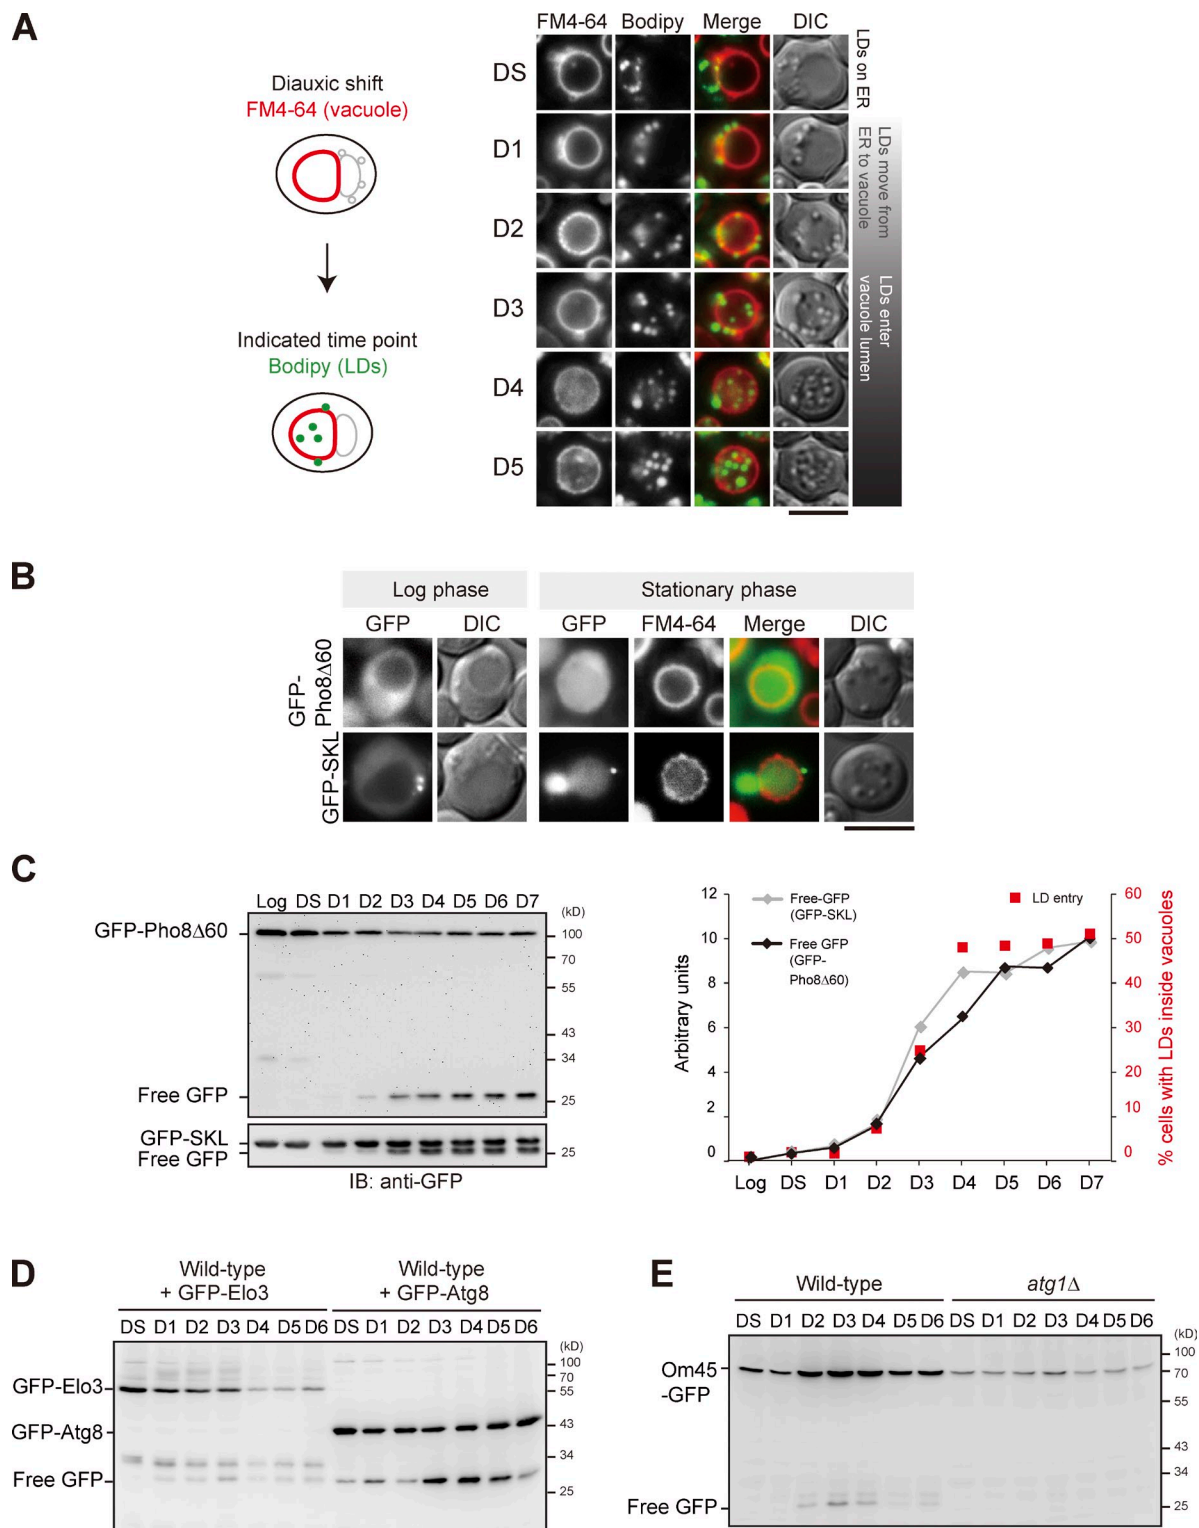

Figure S1. **Various forms of autophagy are activated during stat-phase.** (A, left) The scheme of vacuole and LD staining. (right) Representative images of LD association with vacuoles in wild-type cells grown from DS to D5. (B) Cells expressing GFP-Pho8 $\Delta$ 60 and GFP-SKL were imaged by fluorescence microscopy under growth conditions as indicated. (C, left) Cells expressing GFP-Pho8 $\Delta$ 60 and GFP-SKL under growth conditions as indicated were lysed, and the lysates were analyzed by immunoblotting (IB) with the anti-GFP antibody. (right) The free GFP signals were quantified and plotted. The percentage of cells containing LDs inside vacuole lumen in A on the same days was compared. The data shown are from a single representative experiment out of three repeats. (D) Wild-type cells expressing GFP-Elo3 or GFP-Atg8 under growth conditions as indicated were lysed, and the lysates were analyzed by immunoblotting with anti-GFP antibody. (E) Wild-type and *atg1* $\Delta$  cells harboring endogenous Om45-GFP under growth conditions as indicated were lysed, and the lysates were analyzed by immunoblotting with the anti-GFP antibody. DIC, differential interference contrast. Bars, 5  $\mu$ m.

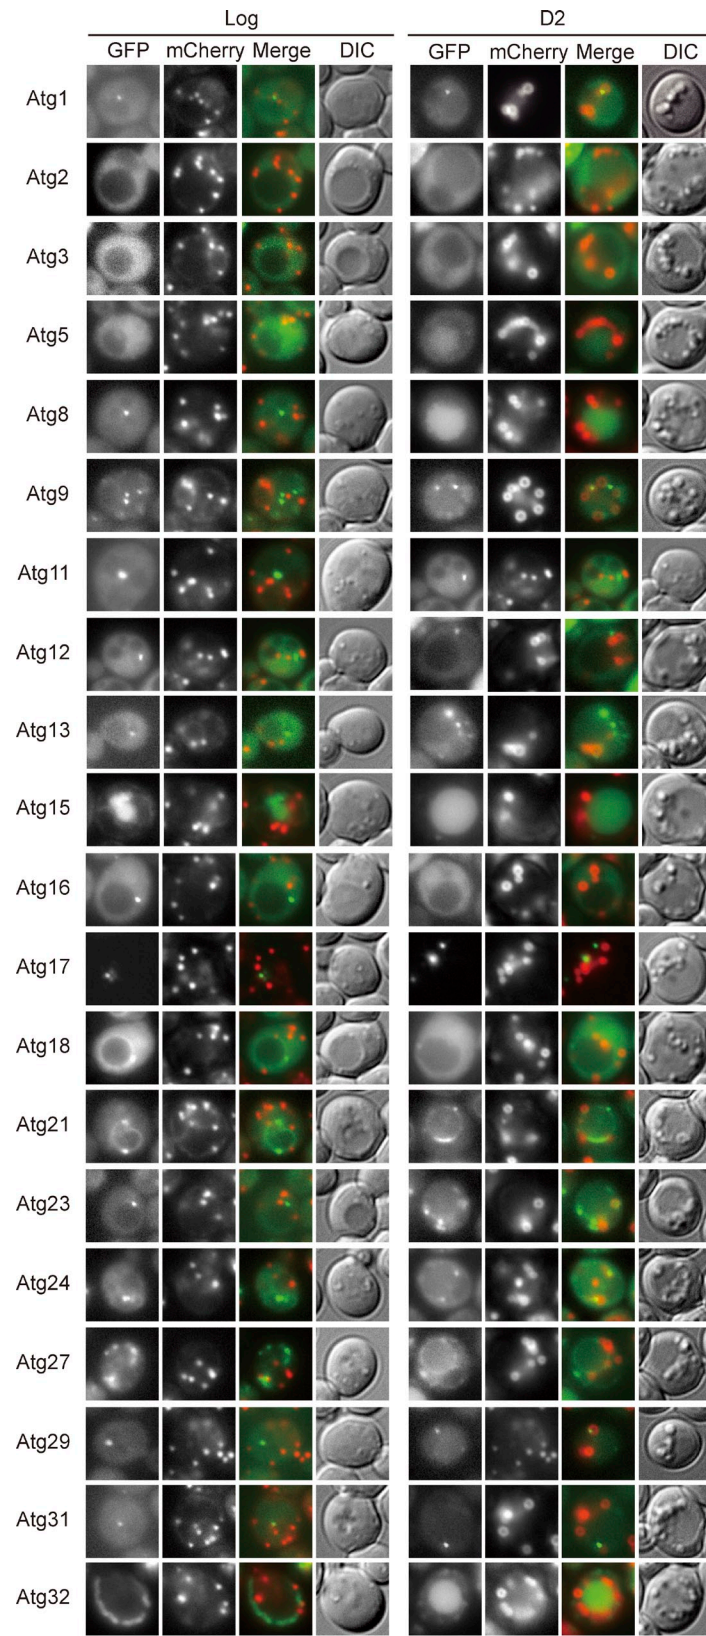

Figure S2. **Localization of various GFP-tagged Atg proteins during log and stat-phase.** Cells expressing Erg6-mCherry and various GFP-tagged Atg proteins as indicated grown in SC medium to log phase or D2 were imaged by fluorescence microscopy. DIC, differential interference contrast. Bar, 5  $\mu$ m.

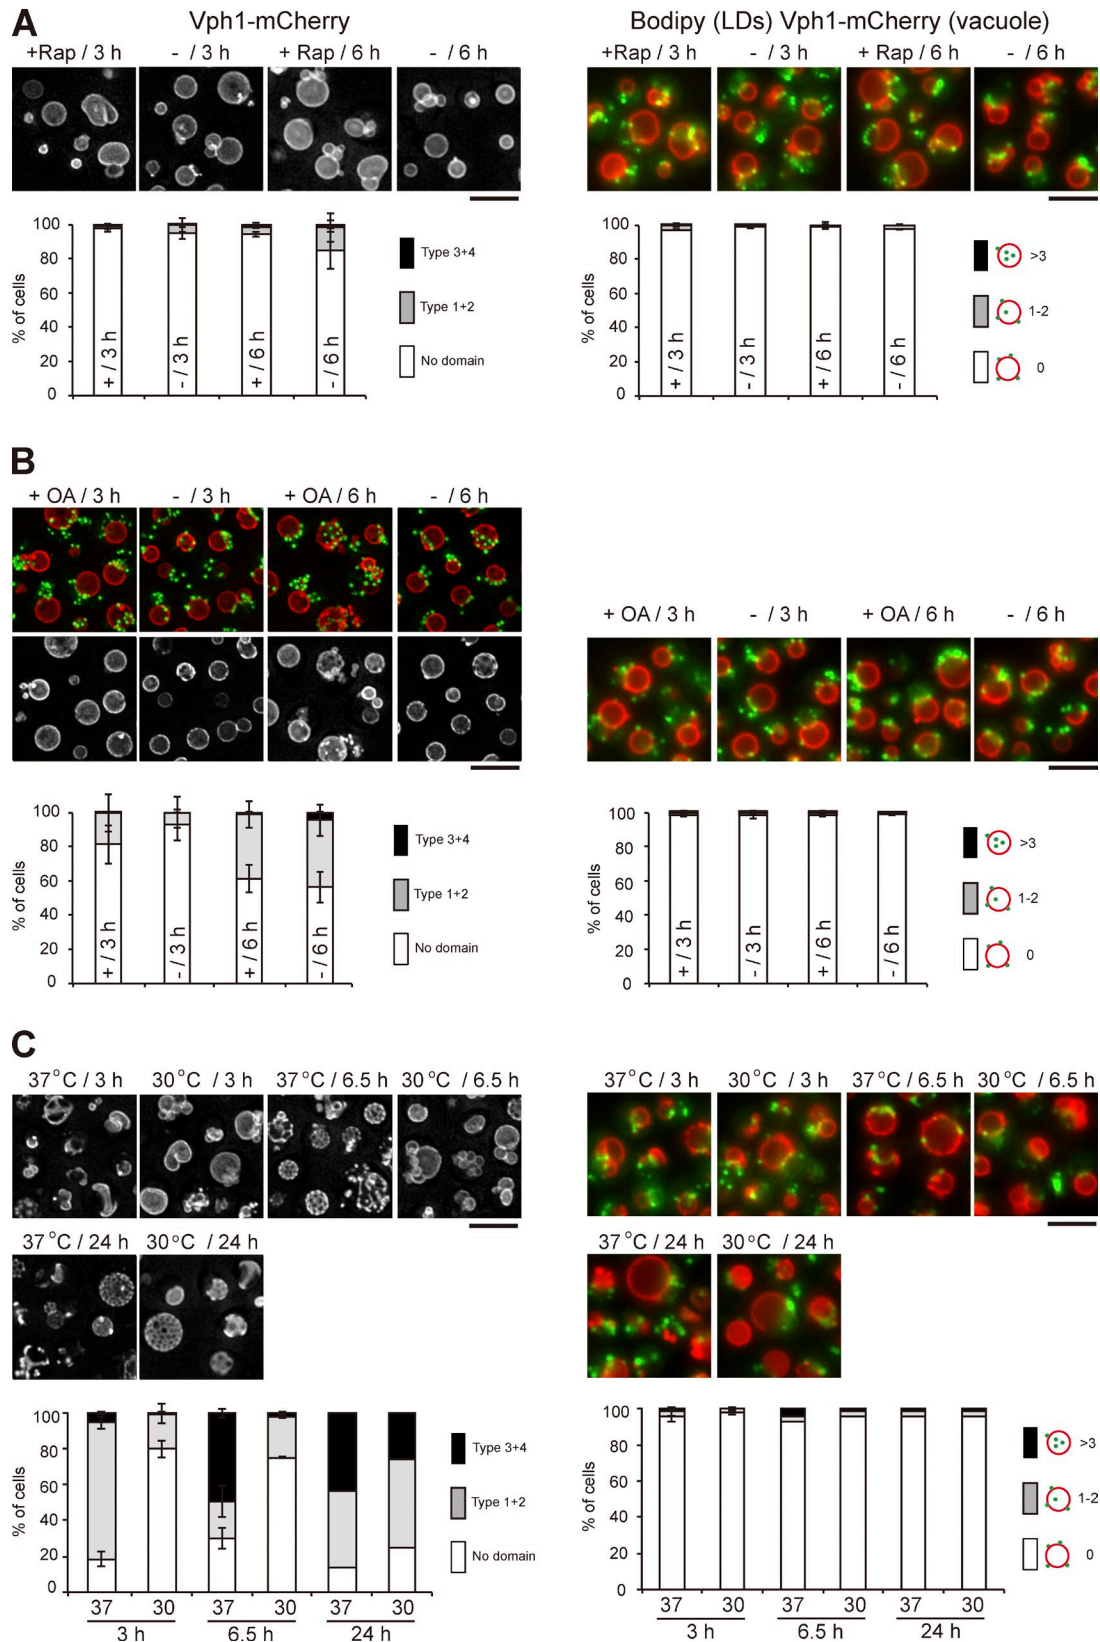

Figure S3. **Rapamycin, oleate, and higher temperature shift did not induce LD translocation into vacuoles.** (A) Cells expressing Vph1-mCherry grown in SC medium at 30°C to log phase were treated with (+) or without (-) 0.2  $\mu$ g/ml rapamycin (Rap) for 3 or 6 h. (left) The representative images of Vph1-mCherry processed by deconvolution and maximal projection. The data were quantified based on the three indicated patterns. (right) Cells were stained with BODIPY (LDs) and imaged by fluorescence microscopy. The data were quantified based on the three indicated patterns. (B) Same as A, except that cells were grown in SC medium with 1% Brij to log phase and treated with (+) or without (-) 1% oleic acids (OA). (left) The merged Vph1-GFP and LDs (BODIPY) images were also shown for the comparison of LD numbers. (C) Same as A, except that cells were grown in SC medium to DS followed by 1:1 diluted into SC medium prewarmed to 30 or 37°C and incubated for 3, 6.5, or 24 h. Data are means  $\pm$  SEM. Bars, 5  $\mu$ m.



Table S1. Yeast strains and plasmids used in this study

| Strain                | Description                                                                                                                   | Source                |
|-----------------------|-------------------------------------------------------------------------------------------------------------------------------|-----------------------|
| BY4742                | <i>MAT<math>\alpha</math> leu2<math>\Delta</math> his3<math>\Delta</math> ura3<math>\Delta</math> lys2<math>\Delta</math></i> | Laboratory collection |
| CWY6290               | <i>ELO3-VENUS::LEU HIS::GPD-CFP-PHO8 ERG6-mCherry::KAN BY4742</i>                                                             | This study            |
| CWY6302               | <i>atg1<math>\Delta</math>::HYG BY4742</i>                                                                                    | This study            |
| CWY6304               | <i>atg2<math>\Delta</math>::HYG BY4742</i>                                                                                    | This study            |
| Laboratory collection | <i>atg3<math>\Delta</math>::KAN BY4742</i>                                                                                    | Invitrogen            |
| CWY6469               | <i>atg4<math>\Delta</math>::KAN BY4742</i>                                                                                    | This study            |
| Laboratory collection | <i>atg5<math>\Delta</math>::KAN BY4742</i>                                                                                    | Invitrogen            |
| CWY6306               | <i>atg6<math>\Delta</math>::HYG BY4742</i>                                                                                    | This study            |
| CWY6308               | <i>atg7<math>\Delta</math>::HYG BY4742</i>                                                                                    | This study            |
| CWY6471               | <i>atg8<math>\Delta</math>::KAN BY4742</i>                                                                                    | This study            |
| Laboratory collection | <i>atg9<math>\Delta</math>::KAN BY4742</i>                                                                                    | Invitrogen            |
| CWY6473               | <i>atg10<math>\Delta</math>::KAN BY4742</i>                                                                                   | This study            |
| Laboratory collection | <i>atg11<math>\Delta</math>::KAN BY4742</i>                                                                                   | Invitrogen            |
| CWY6475               | <i>atg12<math>\Delta</math>::KAN BY4742</i>                                                                                   | This study            |
| Laboratory collection | <i>atg13<math>\Delta</math>::KAN BY4742</i>                                                                                   | Invitrogen            |
| CWY6497               | <i>atg14<math>\Delta</math>::LEU BY4742</i>                                                                                   | This study            |
| Laboratory collection | <i>atg15<math>\Delta</math>::LEU BY4742</i>                                                                                   | Invitrogen            |
| Laboratory collection | <i>atg16<math>\Delta</math>::KAN BY4742</i>                                                                                   | Invitrogen.           |
| CWY6499               | <i>atg17<math>\Delta</math>::LEU BY4742</i>                                                                                   | This study            |
| Laboratory collection | <i>atg18<math>\Delta</math>::KAN BY4742</i>                                                                                   | Invitrogen            |
| Laboratory collection | <i>atg19<math>\Delta</math>::KAN BY4742</i>                                                                                   | Invitrogen            |
| Laboratory collection | <i>atg20<math>\Delta</math>::KAN BY4742</i>                                                                                   | Invitrogen            |
| CWY6501               | <i>atg21<math>\Delta</math>::LEU BY4742</i>                                                                                   | This study            |
| Laboratory collection | <i>atg22<math>\Delta</math>::KAN BY4742</i>                                                                                   | Invitrogen            |
| Laboratory collection | <i>atg23<math>\Delta</math>::KAN BY4742</i>                                                                                   | Invitrogen            |
| Laboratory collection | <i>atg24<math>\Delta</math>::KAN BY4742</i>                                                                                   | Invitrogen            |
| Laboratory collection | <i>atg26<math>\Delta</math>::KAN BY4742</i>                                                                                   | Invitrogen            |
| Laboratory collection | <i>atg27<math>\Delta</math>::KAN BY4742</i>                                                                                   | Invitrogen            |
| Laboratory collection | <i>atg29<math>\Delta</math>::KAN BY4742</i>                                                                                   | Invitrogen            |
| Laboratory collection | <i>atg31<math>\Delta</math>::KAN BY4742</i>                                                                                   | Invitrogen            |
| Laboratory collection | <i>atg32<math>\Delta</math>::KAN BY4742</i>                                                                                   | Invitrogen            |
| Laboratory collection | <i>atg33<math>\Delta</math>::KAN BY4742</i>                                                                                   | Invitrogen            |
| CWY6503               | <i>atg34<math>\Delta</math>::LEU BY4742</i>                                                                                   | This study            |
| Laboratory collection | <i>atg36<math>\Delta</math>::KAN BY4742</i>                                                                                   | Invitrogen            |
| CWY7336               | <i>FAA4-GFP::HIS BY4742</i>                                                                                                   | This study            |
| CWY7464               | <i>atg1<math>\Delta</math>::LEU FAA4-GFP::HIS BY4742</i>                                                                      | This study            |
| CWY7466               | <i>atg6<math>\Delta</math>::LEU FAA4-GFP::HIS BY4742</i>                                                                      | This study            |
| CWY6294               | <i>atg1<math>\Delta</math>::HYG ELO3-VENUS::LEU HIS::GPD-CFP-PHO8 ERG6-mCherry::KAN BY4742</i>                                | This study            |
| CWY6312               | <i>atg2<math>\Delta</math>::HYG ELO3-VENUS::LEU HIS::GPD-CFP-PHO8 ERG6-mCherry::KAN BY4742</i>                                | This study            |
| CWY6298               | <i>atg7<math>\Delta</math>::HYG ELO3-VENUS::LEU HIS::GPD-CFP-PHO8 ERG6-mCherry::KAN BY4742</i>                                | This study            |
| CWY6758               | <i>VPH1-GFP::LEU ERG6-mCherry::KAN BY4742</i>                                                                                 | This study            |
| CWY7085               | <i>GTR2-3xGFP::HIS ERG6-mCherry::LEU BY4742</i>                                                                               | This study            |
| CWY6760               | <i>IVY1-GFP::LEU ERG6-mCherry::KAN BY4742</i>                                                                                 | This study            |
| CWY7129               | <i>VPH1-mCherry::LEU BY4742</i>                                                                                               | This study            |
| CWY7183               | <i>ATG6-3xGFP::HIS VPH1-mCherry::LEU BY4742</i>                                                                               | This study            |
| CWY7325               | <i>ATG6-3xGFP::HIS GTR2-mCherry::LEU BY4742</i>                                                                               | This study            |
| CWY7226               | <i>ATG14-3xGFP::HIS VPH1-mCherry::LEU BY4742</i>                                                                              | This study            |
| CWY7327               | <i>ATG14-3xGFP::HIS IVY1-mCherry::LEU BY4742</i>                                                                              | This study            |
| CWY7169               | <i>VPH1-mCherry::LEU fab1<math>\Delta</math>::KAN BY4742</i>                                                                  | This study            |
| CWY7161               | <i>VPH1-mCherry::LEU vps4<math>\Delta</math>::KAN BY4742</i>                                                                  | This study            |
| CWY7159               | <i>VPH1-mCherry::LEU nem1<math>\Delta</math>::KAN BY4742</i>                                                                  | This study            |
| Laboratory collection | <i>fab1<math>\Delta</math>::KAN BY4742</i>                                                                                    | Invitrogen            |
| Laboratory collection | <i>vps4<math>\Delta</math>::KAN BY4742</i>                                                                                    | Invitrogen            |
| Laboratory collection | <i>nem1<math>\Delta</math>::KAN BY4742</i>                                                                                    | Invitrogen            |
| Laboratory collection | <i>pep4<math>\Delta</math>::KAN BY4742</i>                                                                                    | Invitrogen            |
| CWY7266               | <i>VPH1-mCherry::LEU pep4<math>\Delta</math>::KAN BY4742</i>                                                                  | This study            |
| CWY7204               | <i>VPH1-mCherry::LEU atg1<math>\Delta</math>::HYG BY4742</i>                                                                  | This study            |
| CWY7212               | <i>VPH1-mCherry::LEU atg6<math>\Delta</math>::HYG BY4742</i>                                                                  | This study            |

Table S1. Yeast strains and plasmids used in this study (Continued)

| Strain  | Description                                    | Source             |
|---------|------------------------------------------------|--------------------|
| CWY7216 | VPH1-mCherry::LEU atg7Δ::HYG BY4742            | This study         |
| CWY7220 | VPH1-mCherry::LEU atg8Δ::KAN BY4742            | This study         |
| CWY7234 | VPH1-mCherry::LEU atg11Δ::KAN BY4742           | This study         |
| CWY7250 | VPH1-mCherry::HIS atg14Δ::LEU BY4742           | This study         |
| CWY7238 | VPH1-mCherry::LEU atg19Δ::KAN BY4742           | This study         |
| CWY7254 | VPH1-mCherry::HIS atg21Δ::LEU BY4742           | This study         |
| CWY7242 | VPH1-mCherry::LEU atg32Δ::KAN BY4742           | This study         |
| CWY7246 | VPH1-mCherry::LEU atg33Δ::KAN BY4742           | This study         |
| CWY4836 | are1Δ::KAN are2Δ::HIS BY4742                   | This study         |
| CWY3626 | dga1Δ::KAN Iro1Δ::HIS BY4742                   | Wang and Lee, 2012 |
| CWY7167 | VPH1-mCherry::LEU are1Δ::KAN are2Δ::HIS BY4742 | This study         |
| CWY7442 | OM45-GFP::LEU BY4742                           | This study         |
| CWY7444 | atg1Δ::HYG OM45-GFP::LEU BY4742                | This study         |
| CWY6555 | ATG1-GFP::LEU ERG6-mCherry::KAN BY4742         | This study         |
| CWY6558 | ATG3-GFP::LEU ERG6-mCherry::KAN BY4742         | This study         |
| CWY6592 | ATG9-GFP::LEU ERG6-mCherry::KAN BY4742         | This study         |
| CWY6572 | ATG13-GFP::LEU ERG6-mCherry::KAN BY4742        | This study         |
| CWY6580 | ATG21-GFP::LEU ERG6-mCherry::KAN BY4742        | This study         |
| CWY6582 | ATG23-GFP::LEU ERG6-mCherry::KAN BY4742        | This study         |
| CWY6584 | ATG24-GFP::LEU ERG6-mCherry::KAN BY4742        | This study         |
| CWY6586 | ATG27-GFP::LEU ERG6-mCherry::KAN BY4742        | This study         |
| CWY6679 | ATG29-GFP::HIS ERG6-mCherry::KAN BY4742        | This study         |

Table S2. Plasmids used in this study

| Plasmid                                                | Description/reference                                                                                                                                                        |
|--------------------------------------------------------|------------------------------------------------------------------------------------------------------------------------------------------------------------------------------|
| pRS416-P <sub>GPD</sub> -GFP-Pho8Δ60-T <sub>CYC1</sub> | GPD promoter–GFP-PHO8Δ60-CYC1 terminator cloned into pRS416                                                                                                                  |
| pRS416-P <sub>GPD</sub> -GFP-SKL-T <sub>CYC1</sub>     | GPD promoter–GFP-SKL-CYC1 terminator cloned into pRS416                                                                                                                      |
| pBS-GTR2-3xGFP-His3                                    | GTR2 ORF residues 778–1,025 and the residues 50–411 after stop codon were cloned into HindIII–BamHI and SacI sites, respectively, of pBS-3xGFP-His3 (Toshima et al., 2006)   |
| pBS-ATG6-3xGFP-His3                                    | ATG6 ORF residues 1,248–1,672 and the residues 57–572 after stop codon were cloned into HindIII–BamHI and SacI sites, respectively, of pBS-3xGFP-His3 (Toshima et al., 2006) |
| pBS-ATG14-3xGFP-His3                                   | ATG14 ORF residues 763–1,033 and the residues 44–455 after stop codon were cloned into HindIII–BamHI and SacI sites, respectively, of pBS-3xGFP-His3 (Toshima et al., 2006)  |
| pFA6α-His3-GPD-CFP                                     | GPD promoter–N-terminal CFP integration plasmid with a His3 marker                                                                                                           |
| pFA6α-VENUS-LEU2                                       | C-terminal VENUS integration plasmid with a LEU2 marker                                                                                                                      |
| pFA6α-mCherry-KanMX6                                   | C-terminal mCherry integration plasmid with a KanMX6 marker                                                                                                                  |
| pFA6α-mCherry-LEU2                                     | C-terminal mCherry integration plasmid with a LEU2 marker                                                                                                                    |
| pFA6α-mCherry-His3                                     | C-terminal mCherry integration plasmid with a His3 marker                                                                                                                    |
| pFA6α-GFP-LEU2                                         | C-terminal GFP integration plasmid with a LEU2 marker                                                                                                                        |
| pFA6α-GFP-His3MX6                                      | Longtine et al., 1998                                                                                                                                                        |
| pFA6α-His3MX6                                          | Longtine et al., 1998                                                                                                                                                        |
| pFA6α-HYG                                              | Deletion plasmid with a Hygromycin resistance gene marker                                                                                                                    |
| pFA6α-LEU2                                             | Deletion plasmid with a LEU2 marker                                                                                                                                          |
| pFA6α-KanMX6                                           | Longtine et al., 1998                                                                                                                                                        |
| pRS416-P <sub>GPD</sub> -GFP-Elo3-T <sub>CYC1</sub>    | GPD promoter–GFP-ELO3-CYC1 terminator cloned into pRS416                                                                                                                     |
| pRS416-P <sub>Cu</sub> -GFP-Atg8 (Aut7)                | Kim et al., 2002                                                                                                                                                             |
| pRS416-P <sub>ADH1</sub> -ATG2-GFP-T <sub>CYC1</sub>   | ADH1 promoter–ATG2-GFP-CYC1 terminator cloned into pRS416                                                                                                                    |
| pRS416-P <sub>ADH1</sub> -ATG5-GFP-T <sub>CYC1</sub>   | ADH1 promoter–ATG5-GFP-CYC1 terminator cloned into pRS416                                                                                                                    |
| pRS416-P <sub>Cu</sub> -GFP-Atg11 (Cvt9)               | Kim et al., 2001                                                                                                                                                             |
| pRS416-P <sub>ADH1</sub> -GFP-ATG12-T <sub>CYC1</sub>  | ADH1 promoter–GFP-ATG12-CYC1 terminator cloned into pRS416                                                                                                                   |
| pRS416-P <sub>ADH1</sub> -GFP-ATG15-T <sub>CYC1</sub>  | ADH1 promoter–GFP-ATG15-CYC1 terminator cloned into pRS416                                                                                                                   |
| pRS416-P <sub>ADH1</sub> -ATG16-GFP-T <sub>CYC1</sub>  | ADH1 promoter–ATG16-GFP-CYC1 terminator cloned into pRS416                                                                                                                   |
| pRS426-P <sub>Cu</sub> -GFP-ATG17                      | Cheong et al., 2005                                                                                                                                                          |
| pRS426-ATG18-GFP                                       | ATG18-GFP cloned into pRS426                                                                                                                                                 |
| pRS416-P <sub>CYC1</sub> -GFP-Atg32-T <sub>CYC1</sub>  | CYC1 promoter–GFP-ATG32-CYC1 terminator cloned into pRS416                                                                                                                   |

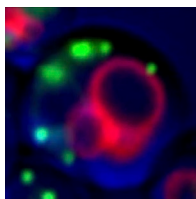

Video 1. **Localization of LDs in wild-type cells during stat-phase.** Wild-type cells stained with FM4-64 (vacuole) at DS and with BODIPY (LDs) at the indicated time points. Images were analyzed by time-lapse microscopy using the Delta Vision system (Applied Precision). Frames were taken every 30 s for 30 min. Cells in D4 were also imaged for z sections. Frames from top to bottom were taken every 0.2  $\mu\text{m}$  for 5  $\mu\text{m}$ . The dotted circles outline the boundaries of yeast cells. N, nucleus; V, vacuole.

## References

- Cheong, H., T. Yorimitsu, F. Reggiori, J.E. Legakis, C.W. Wang, and D.J. Klionsky. 2005. Atg17 regulates the magnitude of the autophagic response. *Mol. Biol. Cell.* 16:3438–3453. <http://dx.doi.org/10.1091/mbc.E04-10-0894>
- Kim, J., Y. Kamada, P.E. Stromhaug, J. Guan, A. Hefner-Gravink, M. Baba, S.V. Scott, Y. Ohsumi, W.A. Dunn Jr., and D.J. Klionsky. 2001. Cvt9/Gsa9 functions in sequestering selective cytosolic cargo destined for the vacuole. *J. Cell Biol.* 153:381–396. <http://dx.doi.org/10.1083/jcb.153.2.381>
- Kim, J., W.P. Huang, P.E. Stromhaug, and D.J. Klionsky. 2002. Convergence of multiple autophagy and cytoplasm to vacuole targeting components to a perivacuolar membrane compartment prior to de novo vesicle formation. *J. Biol. Chem.* 277:763–773. <http://dx.doi.org/10.1074/jbc.M109134200>
- Longtine, M.S., A. McKenzie III, D.J. Demarini, N.G. Shah, A. Wach, A. Brachat, P. Philippsen, and J.R. Pringle. 1998. Additional modules for versatile and economical PCR-based gene deletion and modification in *Saccharomyces cerevisiae*. *Yeast.* 14:953–961. [http://dx.doi.org/10.1002/\(SICI\)1097-0061\(199807\)14:10<953::AID-YEA293>3.0.CO;2-U](http://dx.doi.org/10.1002/(SICI)1097-0061(199807)14:10<953::AID-YEA293>3.0.CO;2-U)
- Toshima, J.Y., J. Toshima, M. Kaksonen, A.C. Martin, D.S. King, and D.G. Drubin. 2006. Spatial dynamics of receptor-mediated endocytic trafficking in budding yeast revealed by using fluorescent  $\alpha$ -factor derivatives. *Proc. Natl. Acad. Sci. USA.* 103:5793–5798. <http://dx.doi.org/10.1073/pnas.0601042103>
- Wang, C.-W., and S.C. Lee. 2012. The ubiquitin-like (UBX)-domain-containing protein Ubx2/Ubx8 regulates lipid droplet homeostasis. *J. Cell Sci.* 125:2930–2939. <http://dx.doi.org/10.1242/jcs.100230>
